# Supplementary material for: Urban Food Insecurity in Nigeria: A Multilevel Analysis of Nationally Representative Data
Source: Research Square preprint supplement (doi:10.21203/rs.3.rs-8041739/v1), 2026-02-09
Supplement: Supplementary file 1 [file 09bb84bbf844cb4618dd9dcb.docx]

**Appendix**

**Appendix A: Food Insecurity Experience Scale (FIES)**

**Supplementary Table A1. Food Insecurity Experience Scale (FIES) Questions** 1

| **Questions** | **During the last 12 MONTHS, was there a time when because of a lack of money or other resources? (YES/NO)** | **(Short reference)** |
| --- | --- | --- |
| (Q1) | You were worried you would not have enough food to eat | (WORRIED) |
| (Q2) | You were unable to eat healthy and nutritious food | (HEALTHY) |
| (Q3) | You ate only a few kinds of foods | (FEWFOODS) |
| (Q4) | You had to skip a meal | (SKIPPED) |
| (Q5) | You ate less than you thought you should | (ATELESS) |
| (Q6) | You ran out of food | (RANOUT) |
| (Q7) | You were hungry but did not eat | (HUNGRY) |
| (Q8) | You went without eating for a whole day | (WHLDAY) |

**Appendix B: FIES Estimation and Rasch Model Diagnostics**

***Estimation and Analytical Procedures***

The estimation of food insecurity prevalence was conducted using the Food Insecurity Experience Scale (FIES), following the analytical framework developed by the FAO under the Voices of the Hungry (VoH) project 2. This approach is based on the Rasch model, a one-parameter logistic model within the Item Response Theory (IRT) framework, which enables the estimation of a latent trait, food insecurity through respondents’ answers to a standardized set of experience-based questions.

***Data Preparation and Scoring***

Each household was administered the standard 8-item FIES questionnaire. A raw score ranging from 0 to 8 was computed for each household by summing the number of affirmative ("yes") responses to the following items: WORRIED, HEALTHY, FEWFOOD, SKIPPED, ATELESS, RANOUT, HUNGRY, and WHLDAY, showed in (**Supplementary Table A1)**. These items capture a continuum of food-related constraints, from anxiety about food access to experiences of severe deprivation. The cleaned and weighted dataset was structured in line with the FAO FIES Shiny App input format, including variables such as sampling weights (wt), area (urban), and zone. The dataset was then uploaded to the FIES Shiny App for further analysis.

***Model Estimation and Fit Testing***

The Rasch model was fitted using the FIES Shiny App to assess item performance, estimate model parameters, and compute respondent-level food insecurity probabilities. Model diagnostics were conducted under the “Item and Raw Score Statistics” tab of the App. Each item’s infit statistic was examined to evaluate individual item fit to the model. In accordance with FAO guidelines, items with infit values outside the 0.7–1.3 range should be flagged for potential exclusion. In our analysis, all items met this criterion and were retained. The mean infit value was 0.96, indicating good overall item fit. Although WORRIED and WHLDAY showed high outfit values (2.01 and 2.10 respectively), their infit values remained within acceptable bounds, indicating no substantial misfit that would require their exclusion (**Supplementary Table A2**). For this analysis, the model reliability was estimated at 76%, exceeding the FAO’s recommended threshold of 71% for the 8-item scale, thereby demonstrating sufficient internal consistency of the instrument in the study context.

**Supplementary Table A2. Rasch Model Item Diagnostics**

| **Item** | **Severity** | **S.E** | **Infit** | **S.E. Infit** | **Outfit** |
| --- | --- | --- | --- | --- | --- |
| (WORRIED) | -2.20 | 0.54525 | 1.085 | 0.034375 | 2.010 |
| (HEALTHY) | -1.25 | 0.044594 | 1.093 | 0.027321 | 1.785 |
| (FEWFOODS) | -1.24 | 0.044501 | 0.981 | 0.027244 | 1.658 |
| (SKIPPED) | -0.21 | 0.037498 | 0.905 | 0.020451 | 0.828 |
| (ATELESS) | -0.78 | 0.040908 | 0.858 | 0.023997 | 1.082 |
| (RANOUT) | 0.64 | 0.034604 | 0.884 | 0.017487 | 0.878 |
| (HUNGRY) | 1.46 | 0.034475 | 0.827 | 0.018717 | 0.866 |
| (WHLDAY) | 3.57 | 0.047100 | 1.081 | 0.033953 | 2.097 |

**S.E = Standard Error**

**Supplementary Table A3.** Residual correlation matrix of the eight Food Insecurity Experience Scale (FIES) items based on Rasch model estimation. Correlation values exceeding ±0.4 may suggest local dependence or redundancy between items. Diagonal values (perfect correlations with self) are omitted.

|  | **Healthy** | **Fewfood** | **Skipped** | **AteLess** | **RunOut** | **Hungry** | **WholeDay** |
| --- | --- | --- | --- | --- | --- | --- | --- |
| **Worried** | 0.11 | 0.08 | -0.05 | -0.04 | -0.08 | -0.10 | -0.12 |
| **Healthy** |  | 0.14 | 0.05 | -0.04 | -0.08 | -0.17 | -0.24 |
| **Fewfood** |  |  | 0.01 | 0.11 | -0.08 | -0.11 | -0.16 |
| **Skipped** |  |  |  | 0.24 | 0.06 | -0.01 | -0.10 |
| **AteLess** |  |  |  |  | 0.09 | 0.02 | -0.12 |
| **RunOut** |  |  |  |  |  | 0.20 | -0.05 |
| **Hungry** |  |  |  |  |  |  | 0.26 |

Residual correlations between FIES items were assessed to evaluate local independence. As shown in **Supplementary Table 3**, all residual correlations were below the commonly accepted threshold of ±0.4, indicating no substantial local dependence between items.

***Raw Score Calibration***

Item severity parameters and raw score severities were estimated using maximum likelihood estimation within the Rasch framework. Each raw score was associated with a corresponding severity level, allowing the mapping of raw scores onto the latent continuum of food insecurity. This enabled the derivation of probabilistic estimates for each household's likelihood of experiencing moderate or severe (FImod+Sev) and severe (FIsev) food insecurity.

***Equating to the Global Reference Scale***

To enable comparability with the FAO global reference scale, equating procedures were conducted using the “Equating” module of the FIES Shiny App. Item severity parameters derived from the Nigerian sample were evaluated against the global standard, and in accordance with FAO guidelines, items with absolute deviations exceeding 0.35 logits were excluded from the equating process. In this study, the items FEWFOODS (“Ate few kinds of food”) and SKIPPED (“Skipped meals”) exceeded this threshold, with deviations of 0.39 and 0.47 logits, respectively *(***see Supplementary Table A4***).* Consequently, they were omitted from the equating step but retained in the overall Rasch model estimation to preserve the scale’s psychometric integrity. A minimum of five items consistent with the global reference scale was maintained, meeting the FAO’s requirement for robust calibration and ensuring that the resulting food insecurity estimates remain globally comparable.

**Supplementary Table A4. Deviation from Global Standard**

| **Item** | **Difference from Global Reference (Logits)** |
| --- | --- |
| (WORRIED) | 0.05 |
| (HEALTHY) | 0.12 |
| (FEWFOODS) | 0.39 |
| (SKIPPED) | 0.47 |
| (ATELESS) | 0.14 |
| (RANOUT) | 0.13 |
| (HUNGRY) | 0.09 |
| (WHLDAY) | 0.19 |

**Appendix C: Descriptive Statistics of FIES Items**

**Supplementary Table A5.** Unweighted and weighted proportions of affirmative responses to the eight Food Insecurity Experience Scale (FIES) questions. Proportions reflect the prevalence of food insecurity experiences in the study sample. Weighted estimates apply sample weights to reflect population-level distributions.

|  | **Unweighted Proportion (%)** | **Weighted Proportion (%)** | |
| --- | --- | --- | --- |
| WORRIED | 75.50 | | 76.00 | |
| HEALTHY | 71.60 | | 71.70 | |
| FEWFOOD | 72.20 | | 71.70 | |
| SKIPPED | 63.90 | | 64.80 | |
| ATELESS | 68.70 | | 68.90 | |
| RANOUT | 57.10 | | 57.10 | |
| HUNGRY | 49.70 | | 48.50 | |
| WHLDAY | 28.70 | | 26.40 | |

**Appendix D: Variable Classification by Socio-Ecological Framework**

**Supplementary Table A6.** Classification of study variables according to the Socio-Ecological Model (SEM), illustrating how determinants of food insecurity were organized across individual, household, and community levels.

| **Socio-Ecological Level** | **Variable** |
| --- | --- |
| Individual level | - Age of Household Head  - Education Level of Household Head |
| Household level | - Household Size  - Gender of Household Head  - Wealth Index  - Type of household ownership  - Household ownership of Agricultural Land  - Household ownership of Livestock  - Presence of Under-Five Children in Household |
| Community level | - Geographical Zone  - Community Wealth or Poverty Level |

**Appendix E: Random Effects Analysis and Multilevel Modeling Results**

**Random effects analysis**

In this study, random effects analysis assessed the variance in moderate or severe food insecurity attributable to community-level clustering, adjusting for individual/household-level (Model I), community-level (Model II), and both (Model III) variables (**Supplementary Table 7**). The Unconditional Model served as a baseline, estimating community-level variance in food insecurity without fixed predictors. The cluster-level variance was 0.63 (SE = 0.79), with an intraclass correlation coefficient (ICC) of 13%, indicating that 13% of the variance was due to community differences.

- **Model I** incorporated individual and household variables (e.g., age, sex, education, household size, wealth, homeownership), which increased the cluster-level variance to 0.76 (SE = 0.87) and the ICC to 19%. This suggests individual and household characteristics influence food insecurity, though clustering effects remain significant. The pseudo-R² for fixed effects was 16%, with a total pseudo-R² of 32%. The Akaike Information Criterion (AIC) improved, reflecting better model fit.
- **Model II** included community-level variables (e.g., geographical zones, wealth/poverty), which reduced community-level variance to 0.54 (SE = 0.73) and the ICC to 14%. The modest pseudo-R² for fixed effects was 2%, with a total pseudo-R² of 16%. These findings highlight the independent role of community-level factors, such as geographic and contextual differences, in shaping food insecurity.
- **In Model III**, combining both individual/household and community-level factors, the cluster-level variance remained at 0.63 (SE = 0.79), with an ICC of 16%. The pseudo-R² for fixed effects was 18%, and the total pseudo-R² was 31%. The lowest AIC value (16,227.1) confirmed this as best-fitting model.

In summary, the ICC values across the models demonstrate that food insecurity is influenced by both individual and contextual factors. These findings justify multilevel modeling to capture the hierarchical nature of food insecurity, providing insights into the relative contributions of individual, household, and community-level factors. The results underscore the need for multi-level interventions to effectively mitigate food insecurity.

**Supplementary Table A7:** Multilevel Model Parameter

| **Model Parameters** | **Null model** | **Model I** | **Model II** | **Model III** |
| --- | --- | --- | --- | --- |
| Cluster-level variance (SD) | 0.63 (0.79) | 0.76 (0.87) | 0.54 (0.73) | 0.63 (0.79) |
| ICC (%) | 13 | 19 | 14 | 16 |
| Pseudo-R² (fixed effects) % |  | 16 | 2 | 18 |
| Pseudo-R² (total) % |  | 32 | 16 | 31 |
| **Model summary** | | | | |
| AIC | 17837.4 | 16289.6 | 17792.12 | 16227.1 |
| BIC | 17851.9 | 16442.4 | 17857.6 | 16430.9 |
| Deviance | 16933.7 | 15439.6 | 16867.3 | 15361.6 |
| Log-likelihood | 8916.7 | 8123.8 | 8887.1 | 8085.6 |

**Abbreviations:** SD = Standard Deviation; ICC = Intraclass Correlation Coefficient; AIC = Akaike Information Criterion; BIC = Bayesian Information Criterion

**Model Descriptions**

- **Null model**: Intercept-only model with no predictors.
- **Model I:** Adjusted for household-level variables: household head (HH) gender, HH age, HH size, HH education, household ownership of dwelling, wealth quintile, ownership of agricultural land, livestock, and presence of under-5 children.
- **Model II:** Adjusted for community-level variables: geographical zones and community poverty/wealth level.
- **Model III:** Adjusted for both household and community-level variables included in Models I and II.
