# Supplementary material for: Urban Food Insecurity in Nigeria: A Multilevel Analysis of Nationally Representative Data
Source: Research Square preprint supplement (doi:10.21203/rs.3.rs-8041739/v1), 2026-02-09
Supplement: Supplementary file 2 [file 2d08373b0445e412ea7d778c.docx]

**Table 1: Socio-demographic and economic characteristics of urban household, MICS6**

| **Variables** | **Frequency (N)** | **Weighted Frequency (N)** | **Proportion (%)** |
| --- | --- | --- | --- |
| **Individual level variables** |  |  |  |
| **HH head Age (Years)** |  |  |  |
| 16-25 | 461 | 699 | 4.5 |
| 26-35 | 1896 | 2691 | 17.32 |
| 36-45 | 2948 | 4528 | 29.15 |
| >45 | 5375 | 7618 | 49.03 |
| **HH head Education*** |  |  |  |
| No Education | 2021 | 2197 | 14.14 |
| Primary | 1770 | 2744 | 17.66 |
| Junior secondary | 415 | 673 | 4.33 |
| Senior secondary | 3266 | 5269 | 33.92 |
| Higher/tertiary | 3208 | 4654 | 29.95 |
| **Household level variables** |  |  |  |
| **HH head Gender** |  |  |  |
| Female | 2230 | 3511 | 22.6 |
| Male | 8450 | 12025 | 77.4 |
| **HH size** |  |  |  |
| ≤5 | 6896 | 10616 | 68.33 |
| >5 | 3784 | 4920 | 31.67 |
| **Type of household ownership** |  |  |  |
| Other | 897 | 1099 | 7.07 |
| Own | 4793 | 5744 | 36.97 |
| Rent | 4990 | 8693 | 55.95 |
| **Household Wealth Quintile**** |  |  |  |
| Poorest | 2678 | 2821 | 18.16 |
| Poor | 2377 | 2987 | 19.23 |
| Middle | 2080 | 3263 | 21 |
| Rich | 1821 | 3319 | 21.36 |
| Richest | 1724 | 3146 | 20.25 |
| **Household Own Agricultural Land** |  |  |  |
| No | 7142 | 11135 | 71.67 |
| Yes | 3538 | 4401 | 28.33 |
| **Household Own Livestock** |  |  |  |
| No | 8004 | 12546 | 80.75 |
| Yes | 2676 | 2991 | 19.25 |
| **Number of children under 5 years old** |  |  |  |
| None | 6054 | 9340 | 60.11 |
| 1 | 2728 | 3899 | 25.09 |
| 2+ | 1898 | 2298 | 14.79 |
| **Community level variables** |  |  |  |
| **Geographical Zones** |  |  |  |
| North-Central | 2086 | 1650 | 10.62 |
| North-East | 1567 | 768 | 4.94 |
| North-West | 1469 | 1936 | 12.46 |
| South-East | 792 | 2615 | 16.83 |
| South-South | 1218 | 2087 | 13.44 |
| South-West | 3548 | 6480 | 41.71 |
| **Community poverty level/quintile** |  |  |  |
| Low | 271 | 228 | 1.47 |
| Medium | 2412 | 2265 | 14.58 |
| High | 7997 | 13043 | 83.95 |

**HH**=Household

*****In the other context, these education levels roughly correspond to: less than high school (primary), high school diploma or equivalent (junior and senior secondary), and college degree or higher (tertiary education).

******Household wealth index was constructed using housing characteristics captured in the household questionnaire (National Bureau of Statistics (NBS) & and United Nations Children’s Fund (UNICEF), 2022).

**Table 2. Multivariate multilevel logistic regression analysis of determinants of moderate or Severe Food insecurity among urban households in Nigeria, MICS6.**

| **Variables** | **Null Model** | **Model I*** | | **Model II**** | | **Model III***** | |
| --- | --- | --- | --- | --- | --- | --- | --- |
| **Fixed effects intercepts** |  |  |  |  |  |  |  |
|  | 0.99 (0.04) | 4.55 (0.15) |  | 4.54 (0.30) |  | 5.45 (0.35) |  |
| **Individual-/household-level factors** |  |  |  |  |  |  |  |
|  |  | **AOR [95% CI]** | ***p*** | **AOR [95% CI]** | ***P*** | **AOR [95% CI]** | ***p*** |
| **HH Gender** |  |  |  |  |  |  |  |
| Female |  | Ref. |  |  |  | Ref. |  |
| Male |  | 1.03 [0.92, 1.15] | 0.6 |  |  | 1.05 [0.94, 1.17] | 0.4 |
| **HH Age (Years)** |  |  |  |  |  |  |  |
| 16-25 |  | Ref. |  |  |  | Ref. |  |
| 26-35 |  | 1.24 [1.00, 1.55] | 0.055 |  |  | **1.26 [1.01, 1.57]** | **0.04** |
| 36-45 |  | **1.49 [1.20, 1.85]** | **<0.001** |  |  | **1.50 [1.20, 1.86]** | **<0.001** |
| >45 |  | 1.24 [1.00, 1.54] | 0.051 |  |  | 1.24 [1.00, 1.54] | 0.051 |
| **Household size** |  |  |  |  |  |  |  |
| <5 |  | Ref. |  |  |  | Ref. |  |
| >5 |  | **1.37 [1.24, 1.52]** | **<0.001** |  |  | **1.38 [1.24, 1.53]** | **<0.001** |
| **HH Education** |  |  |  |  |  |  |  |
| No Education |  | Ref. |  |  |  | Ref. |  |
| Primary |  | **1.59 [1.36, 1.87]** | **<0.001** |  |  | **1.53 [1.31, 1.80]** | **<0.001** |
| Junior secondary |  | **1.52 [1.19, 1.92]** | **<0.001** |  |  | **1.47 [1.15, 1.86]** | **0.002** |
| Senior secondary |  | **1.40 [1.20, 1.64]** | **<0.001** |  |  | **1.36 [1.16, 1.59]** | **<0.001** |
| Higher/tertiary |  | 1.16 [0.99, 1.37] | 0.072 |  |  | 1.13 [0.96, 1.33] | 0.15 |
| **Household Own Dwelling** |  |  |  |  |  |  |  |
| Other |  | Ref. |  |  |  | Ref. |  |
| Own |  | **0.73 [0.60, 0.88]** | **<0.001** |  |  | **0.73 [0.61, 0.88]** | **<0.001** |
| Rent |  | 1.11 [0.93, 1.34] | 0.2 |  |  | 1.09 [0.91, 1.30] | 0.4 |
| **Household Wealth Quintile** |  |  |  |  |  |  |  |
| Poorest |  | Ref. |  |  |  | Ref. |  |
| Poor |  | **0.78 [0.66, 0.92]** | **0.003** |  |  | **0.08 [0.06, 0.10]** | **<0.001** |
| Middle |  | **0.53 [0.45, 0.62]** | **<0.001** |  |  | **0.49 [0.41, 0.58]** | **<0.001** |
| Rich |  | **0.28 [0.23, 0.33]** | **<0.001** |  |  | **0.74 [0.62, 0.87]** | **<0.001** |
| Richest |  | **0.09 [0.07, 0.11]** | **<0.001** |  |  | **0.26 [0.21, 0.31]** | **<0.001** |
| **Household Own Agricultural Land** |  |  |  |  |  |  |  |
| No |  | Ref. |  |  |  | Ref. |  |
| Yes |  | **0.89 [0.80, 0.99]** | **0.025** |  |  | **0.89 [0.80, 0.99]** | **0.026** |
| **Household Own Livestock** |  |  |  |  |  |  |  |
| No |  | Ref. |  |  |  | Ref. |  |
| Yes |  | **0.78 [0.69, 0.87]** | **<0.001** |  |  | **0.80 [0.71, 0.90]** | **<0.001** |
| **Having children under 5 years old** |  |  |  |  |  |  |  |
| No |  | Ref. |  |  |  | Ref. |  |
| Yes |  | **0.80 [0.71, 0.91]** | **<0.001** |  |  | **0.81 [0.72, 0.92]** | **0.001** |
| **Community-level factor** |  |  |  |  |  |  |  |
| **Zones** |  |  |  |  |  |  |  |
| North-Central |  |  |  | Ref. |  | Ref. |  |
| North-East |  |  |  | **0.47 [0.33, 0.65]** | **<0.001** | **0.37 [0.26, 0.53]** | **<0.001** |
| North-West |  |  |  | **0.62 [0.46, 0.82]** | **<0.001** | **0.54 [0.39, 0.73]** | **<0.001** |
| South-East |  |  |  | 1.26 [0.91, 1.74] | 0.2 | **1.49 [1.04, 2.14]** | **0.029** |
| South-South |  |  |  | 0.72 [0.54, 0.95] | 0.02 | 0.79 [0.58, 1.08] | 0.14 |
| South-West |  |  |  | **0.57 [0.45, 0.71]** | **<0.001** | **0.55 [0.43, 0.71]** | **<0.001** |
| **Community-level Poverty/Wealth** |  |  |  |  |  |  |  |
| Low |  |  |  | Ref. |  | Ref. |  |
| Middle |  |  |  | 1.31 [0.74, 2.30] | 0.4 | 1.18 [0.64, 2.16] | 0.6 |
| High |  |  |  | 0.80 [0.46, 1.38] | 0.4 | 1.41 [0.77, 2.58] | 0.3 |
|  |  |  |  |  |  |  |  |

HH: household head **Notes:** All estimates are weighted for the survey’s complex sampling design; Bolded text indicates statistical significance at <.05. **Note:** Results based on a generalized linear mixed model (GLMM) with a binomial outcome (moderate/severe food insecurity), fitted using maximum likelihood estimation (Laplace Approximation). The model was specified with a logit link function and included adaptive Gauss-Hermite quadrature (nAGQ = 1). All estimates were derived using the glmerMod function in R.

*Model I: Individual and household level variables, **Model II: Community level variables, ***Model III: Individual, Household and Community level variables
